# Supplementary material for: Gamma-ray irradiation-induced oxidation and disproportionation at the amorphous SiO2/Si interfaces
Source: Royal Society of Chemistry journal article supplement (doi:10.1039/d0tc03942j), 2020-01-01
Supplement: d0tc03942j1.pdf [file d0tc03942j1.pdf]

## ARTICLE

### Supplementary Information

#### Gamma-ray Irradiation Induced Oxidation and Disproportionation at the amorphous SiO<sub>2</sub>/Si Interfaces

Dechao Meng,<sup>\*,†,ab</sup> Mu Lan,<sup>†,ab</sup> Zeng-hui Yang,<sup>ab</sup> Shouliang Hu,<sup>b</sup> Guanghui Zhang,<sup>ab</sup> Chuanhui Liang,<sup>c</sup> Haoran Zhan,<sup>d</sup> Jiang Liu,<sup>d</sup> Ming Li,<sup>b</sup> Hang Zhou,<sup>ab</sup> Xu Zuo,<sup>e</sup> Yu Song<sup>ab</sup> and Su-Huai Wei<sup>\*,†</sup>

<sup>a</sup>Microsystem and Terahertz Research Center, China Academy of Engineering Physics, Chengdu 610200, China E-mail: mengdechao@mtrc.ac.cn

<sup>b</sup>Institute of Electronic Engineering, China Academy of Engineering Physics, Mianyang 621999, China

<sup>c</sup>Institute of Materials, China Academy of Engineering Physics, Chengdu, Sichuan, 610200, China

<sup>d</sup>Chengdu Green Energy and Green Manufacturing Technology R&D Center, Chengdu Development Center of Science and Technology, Chengdu 610200, China.

<sup>e</sup>College of Electronic Information and Optical Engineering, Nankai University, Tianjin 300071, China

<sup>f</sup>Beijing Computational Science Research Center, Beijing 100094, P. R. China E-mail: suhuaiwei@csrc.ac.cn

† The authors contribute equally to this paper.

\* Corresponding authors.

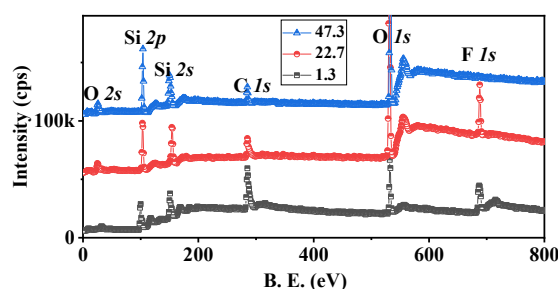

Figure S1. XPS survey results of three typical films with all the elements marked.

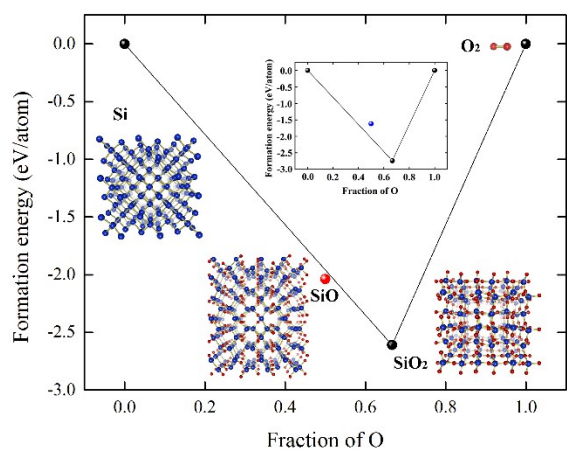

Figure S2. The phase diagram of Si-O calculated with ReaxFF. The formation energy of SiO is below the Si-SiO<sub>2</sub> line, which means the ReaxFF erroneously finds SiO being thermally stable and disallowing disproportionation energetically. For comparison, top inset depicts phase diagram calculated using DFT with the HSE functional. The formation energy of SiO is above the Si-SiO<sub>2</sub> line, showing that SiO is unstable and can decompose into SiO<sub>2</sub> and Si phases.
